# Supplementary material
Source: publisher figshare collection journal article supplement (https://acs.figshare.com/ndownloader/files/4076449)

## Supporting Information

### **Understanding the Reactivity of Enol Ether Radical Cations: Investigation in Anodic Four-Membered Carbon Ring Formation**

**Yusuke Yamaguchi, Yohei Okada, Kazuhiro Chiba\***

Department of Applied Biological Science, Tokyo University of Agriculture and Technology, 3-5-8  
Saiwai-cho, Fuchu, Tokyo 183-8509, Japan

Tel: (+81)-42-367-5667

Fax: (+81)-42-367-5667

E-mail: [chiba@cc.tuat.ac.jp](mailto:chiba@cc.tuat.ac.jp)

#### **Table of contents:**

1. Additional Figures    page 2
2. Copies of  $^1\text{H}$  and  $^{13}\text{C}$  NMR    page 4

## 1. Additional Figures

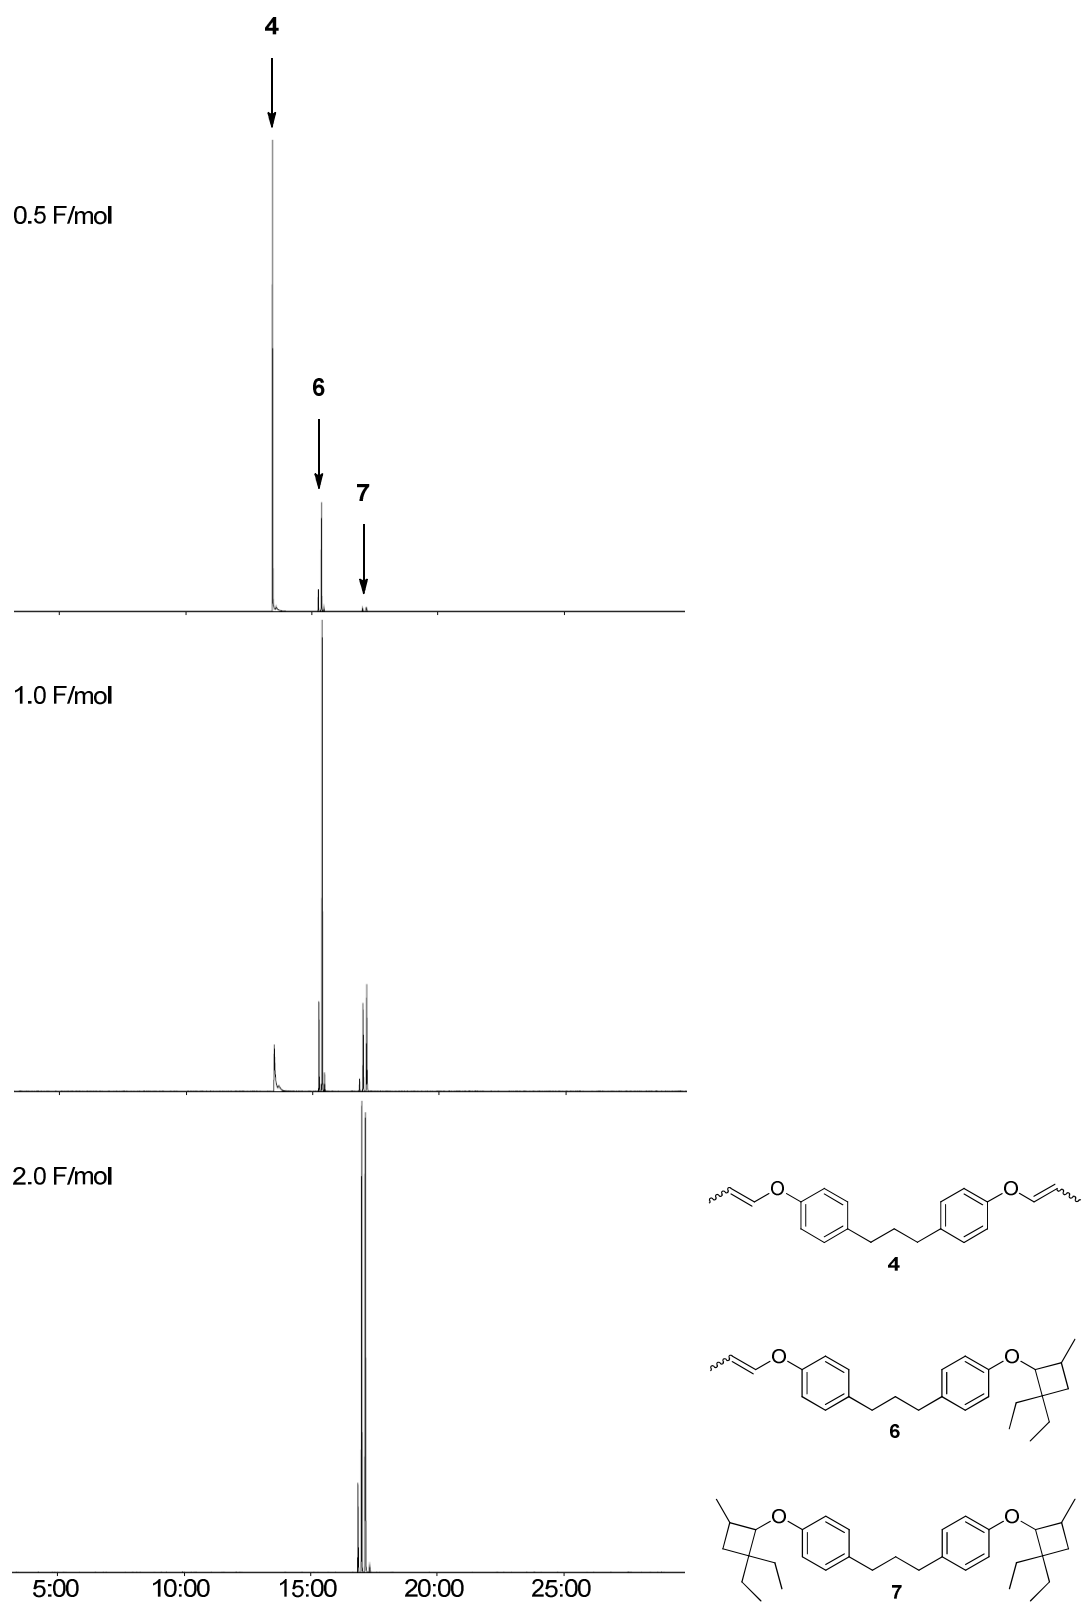

Figure S1. GC-MS spectra of the reaction of (**4**). For clarity, only the peaks containing fragment ion of  $m/z = 308$  (associated with **4**<sup>+</sup>) are shown.

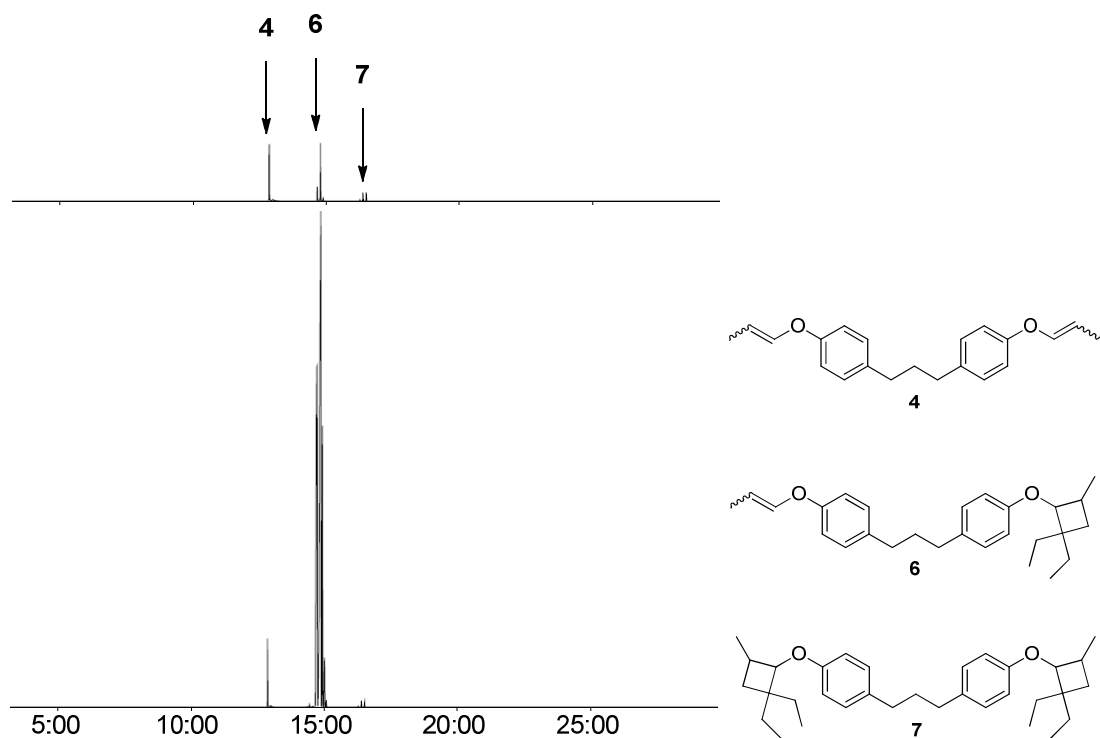

Figure S2. GC-MS spectra of the co-injection experiment. Above: the reaction mixture *before* addition of the alternatively synthesized **6**; below: the reaction mixture *after* addition of the alternatively synthesized **6**. For clarity, only the peaks containing fragment ion of  $m/z = 308$  (associated with **4**<sup>+</sup>) are shown.

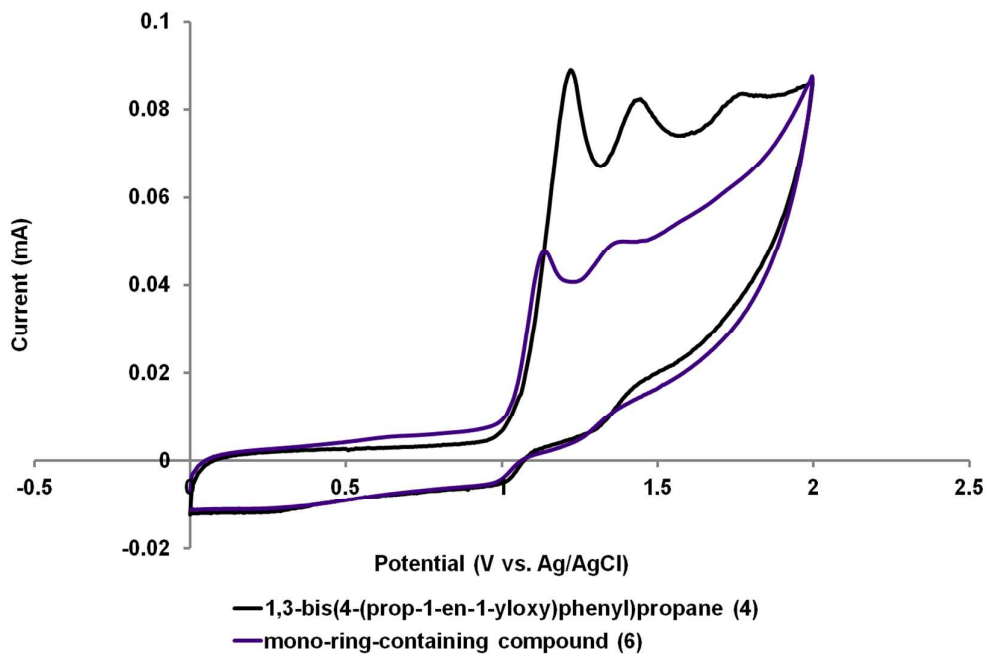

Figure S3. Cyclic voltammograms of 1,3-bis(4-(prop-1-en-1-yloxy)phenyl)propane (**4**) and the mono-ring-containing compound (**6**) in 0.10 M LiClO<sub>4</sub>/MeNO<sub>2</sub>. Concentration of the substrates: 2.0 mM; scan rate: 50 mV/s.

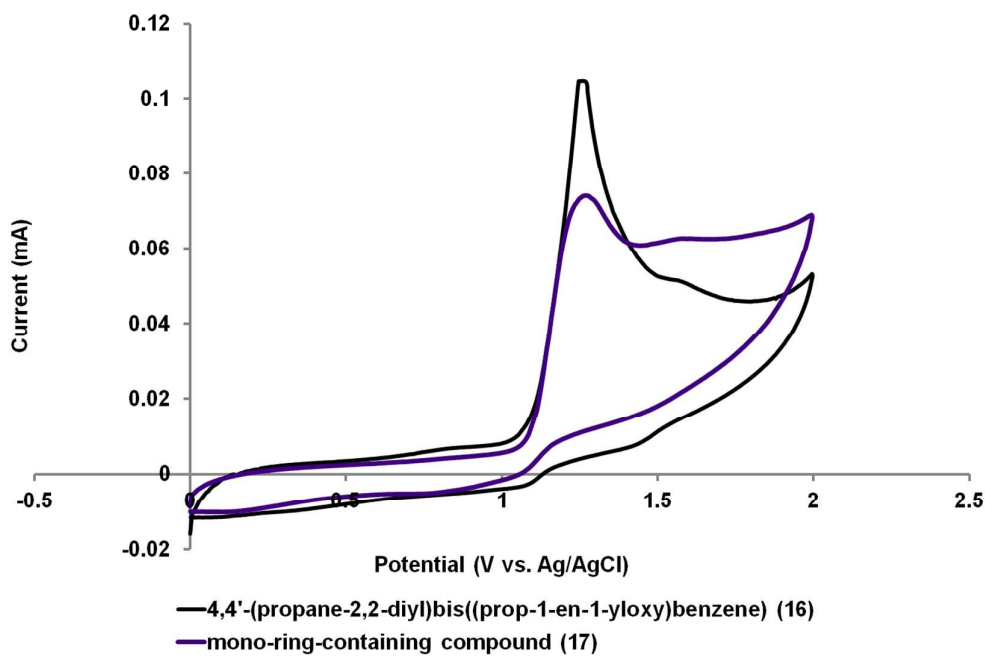

Figure S4. Cyclic voltammograms of 4,4'-(propane-2,2-diyl)bis((prop-1-en-1-yloxy)benzene) (**16**) and the mono-ring-containing compound (**17**) in 0.10 M LiClO<sub>4</sub>/MeNO<sub>2</sub>. Concentration of the substrates: 2.0 mM; scan rate: 50 mV/s.

1,3-bis(4-(prop-1-en-1-yloxy)phenyl)propane (**4**), mixture of diastereomers

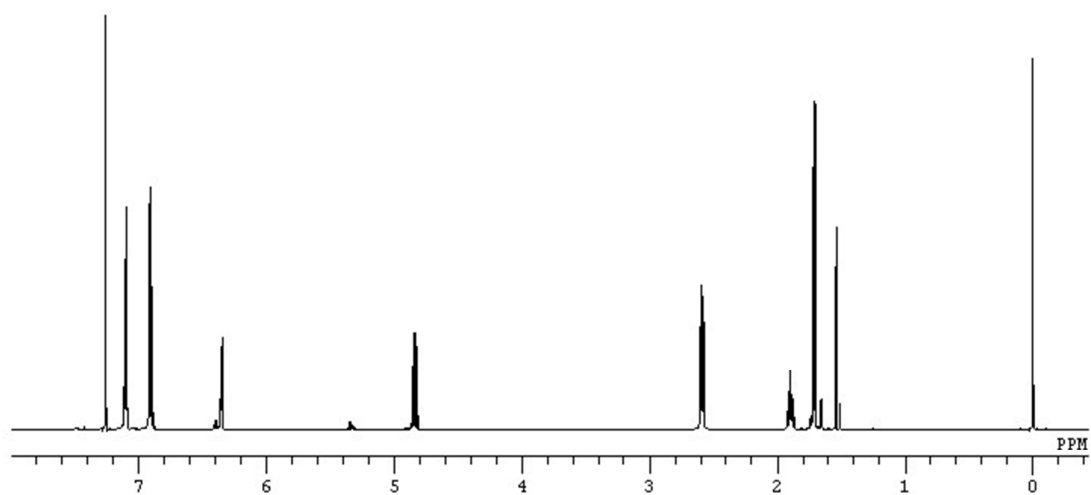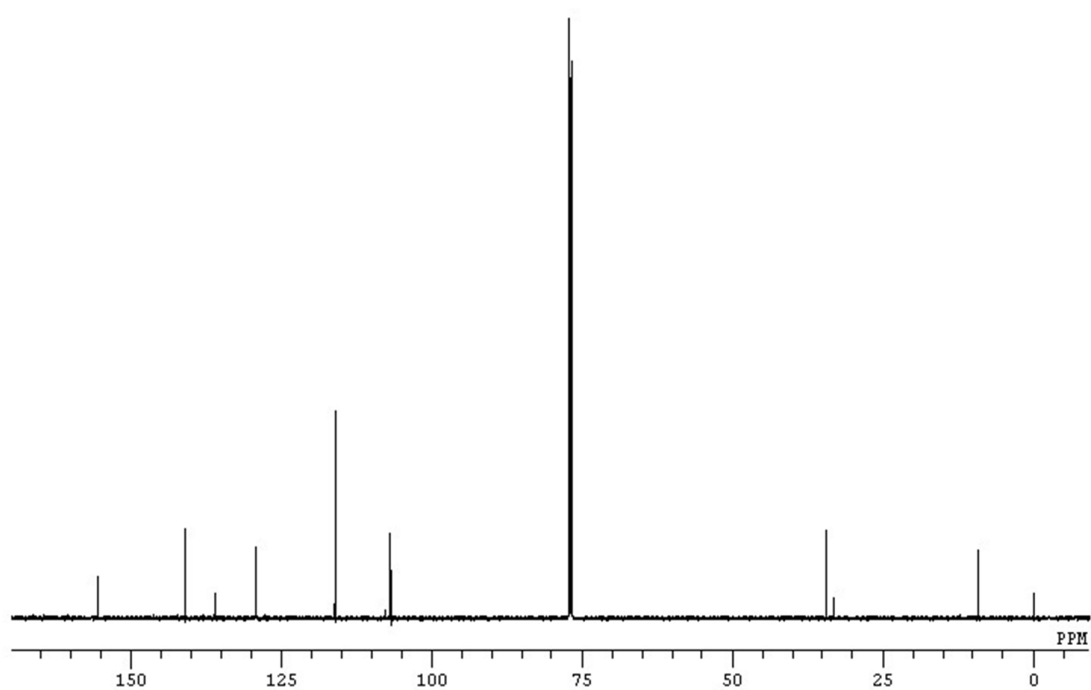

1-(2,2-diethyl-4-methylcyclobutoxy)-4-(3-(4-(prop-1-en-1-yloxy)phenyl)propyl)benzene (**6**),  
mixture of diastereomers

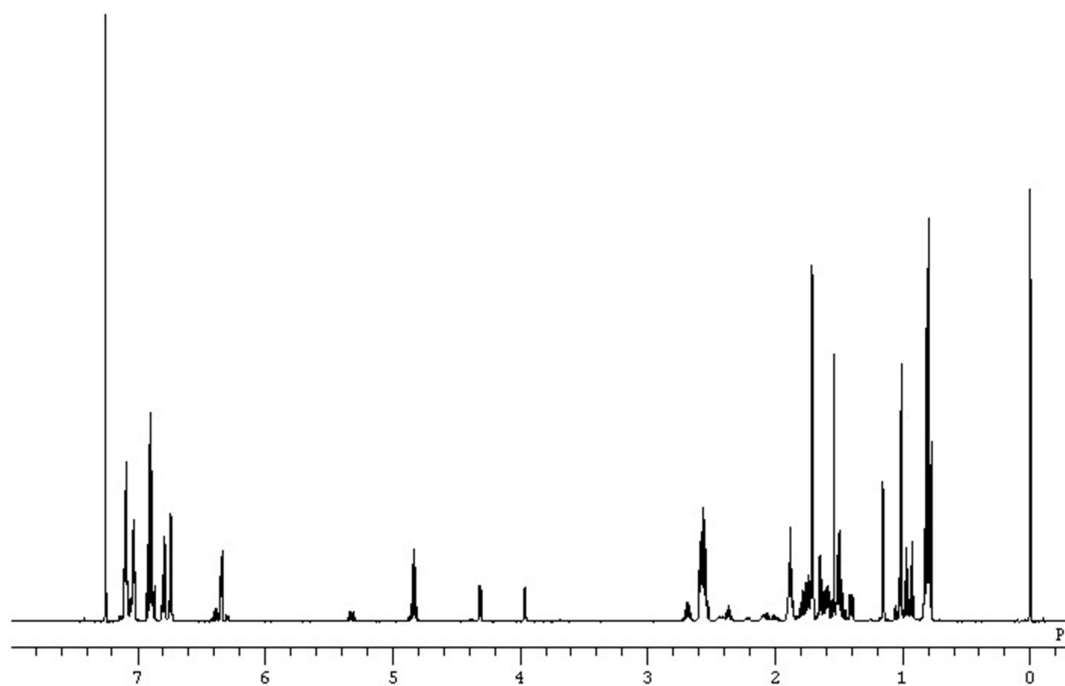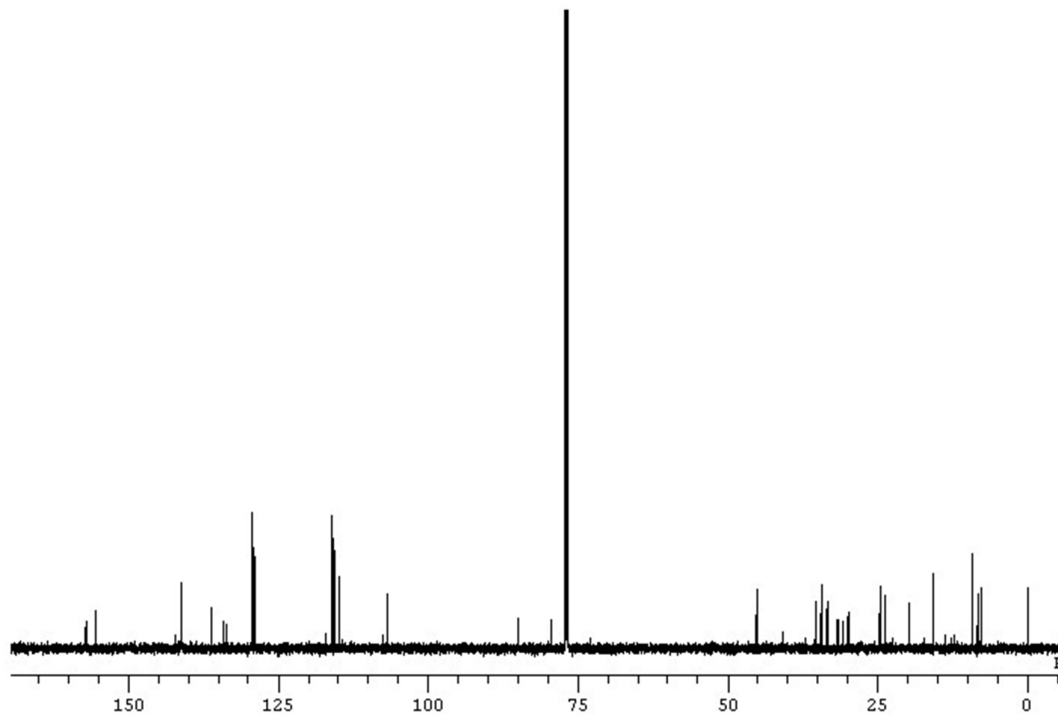

1,3-bis(4-(2,2-diethyl-4-methylcyclobutoxy)phenyl)propane (**7**), mixture of diastereomers

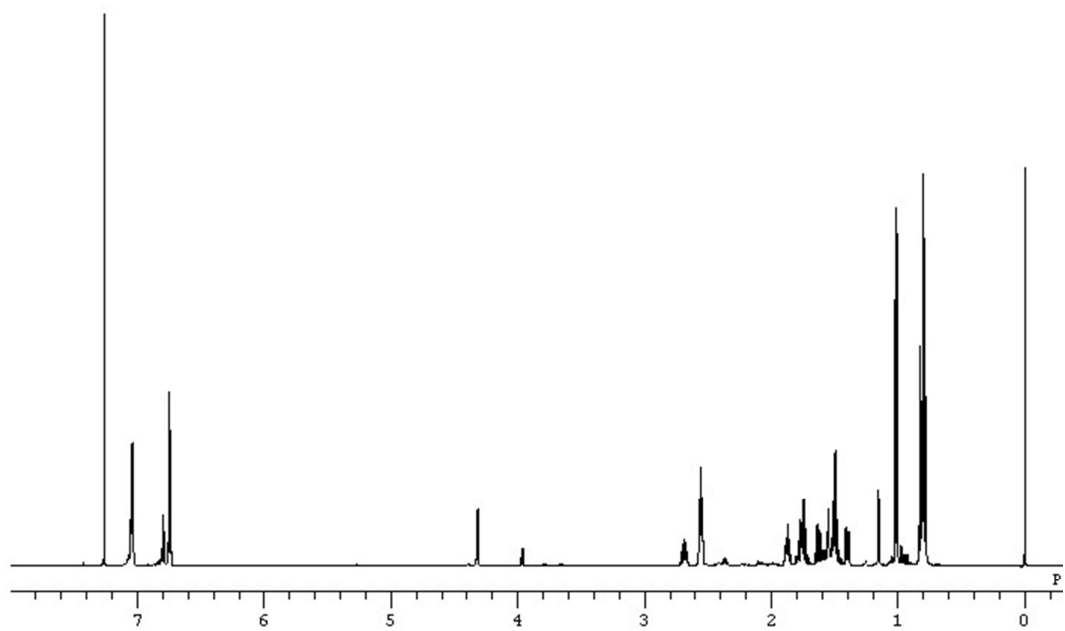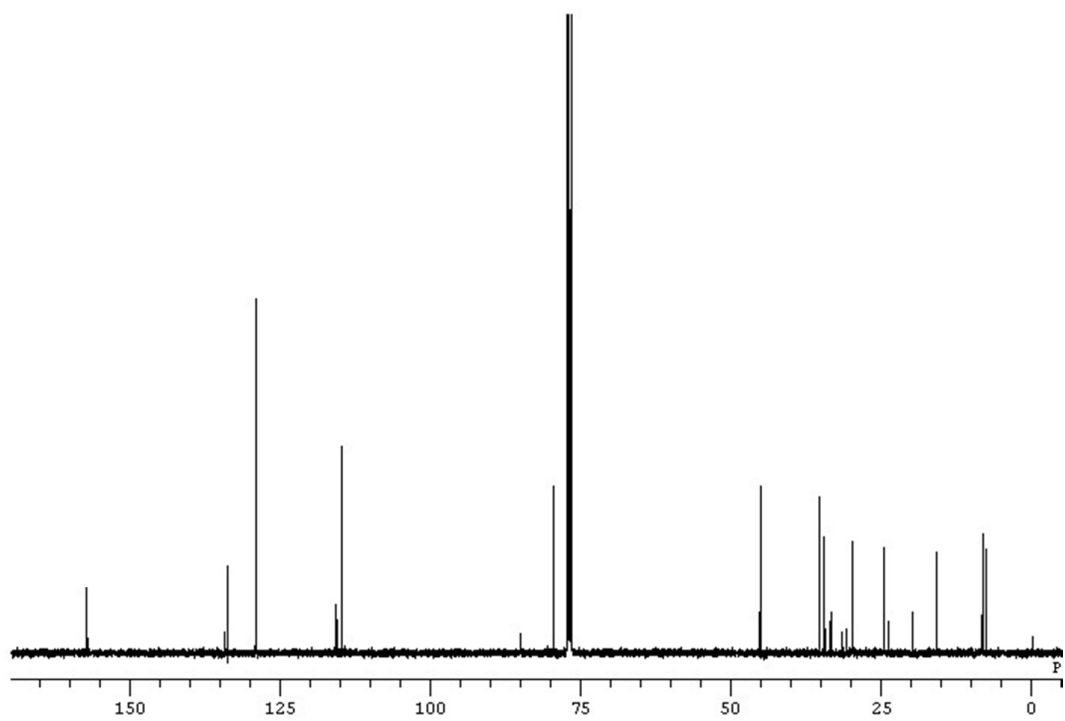

1,2-bis(4-(prop-1-en-1-yloxy)phenyl)ethane (**8**), mixture of diastereomers

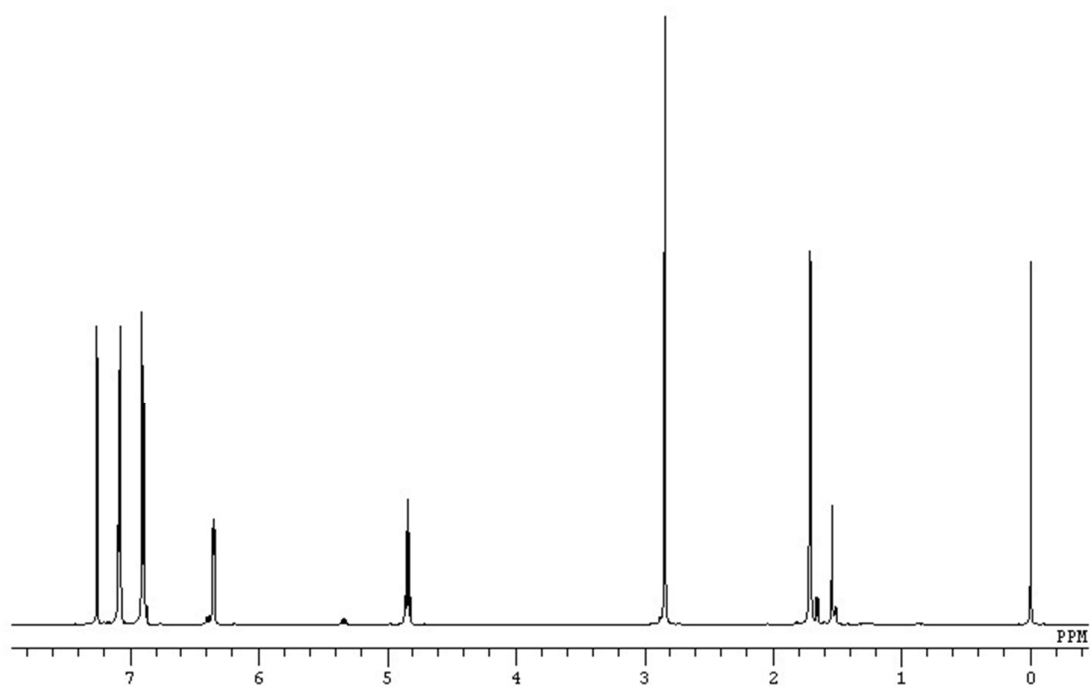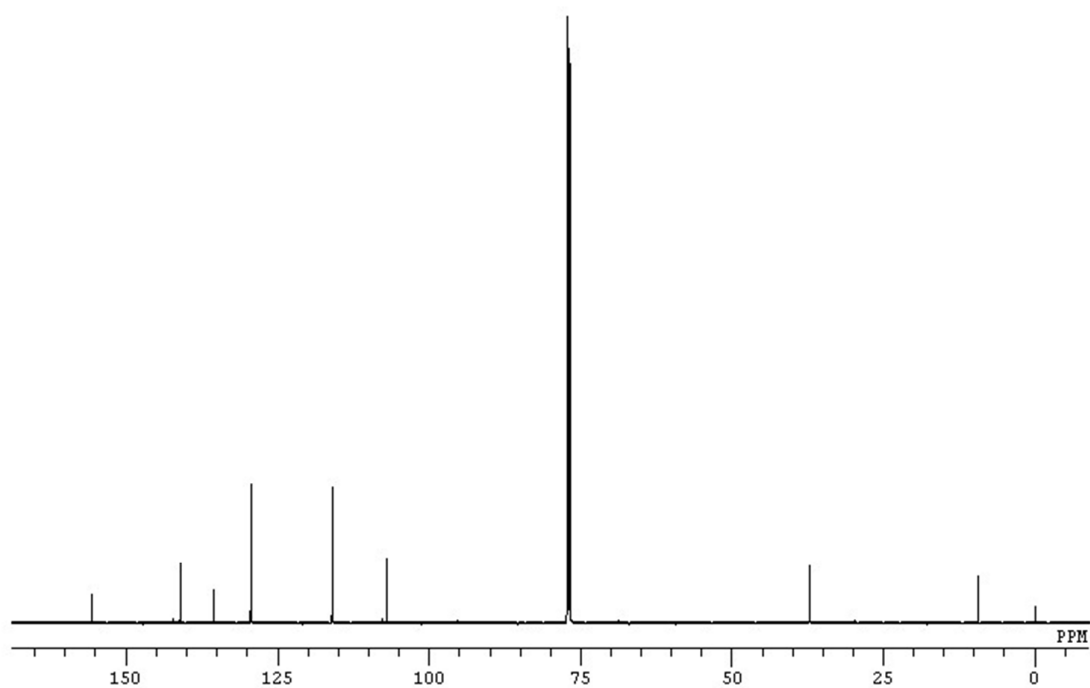



1-(2,2-diethyl-4-methylcyclobutoxy)-4-(4-(prop-1-en-1-yloxy)phenethyl)benzene (**12**), mixture of diastereomers

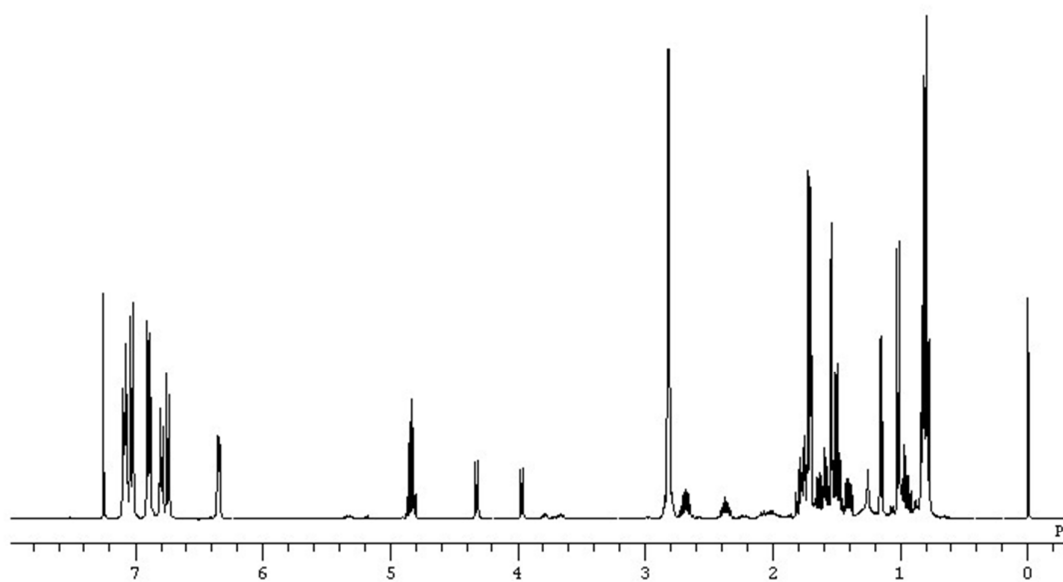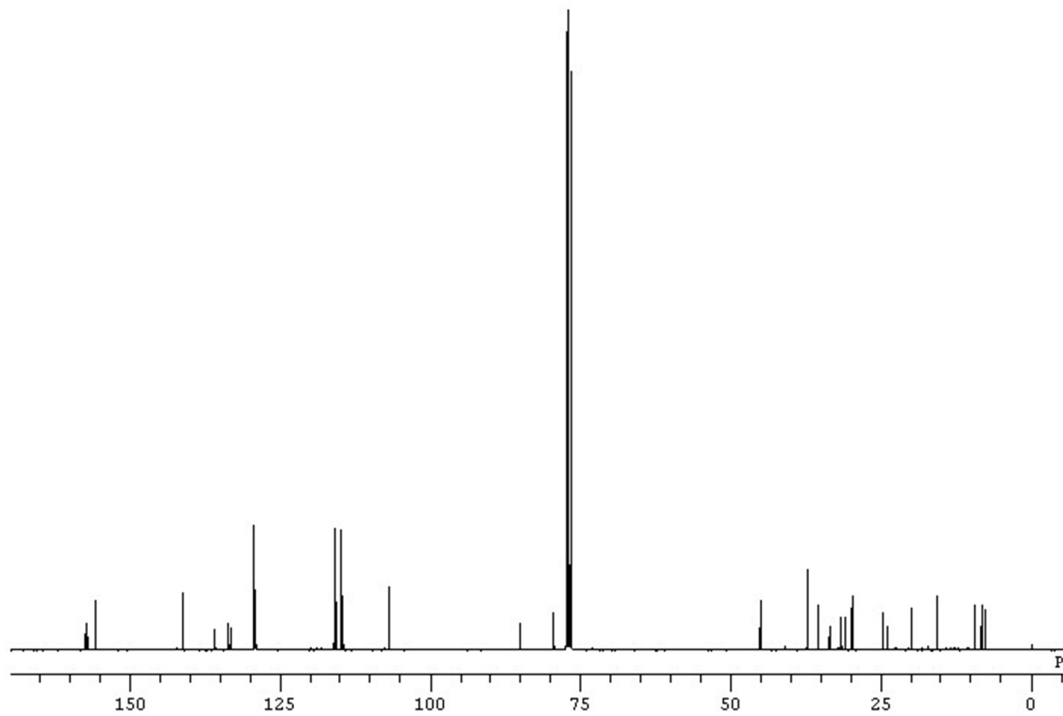

1,2-bis(4-(2,2-diethyl-4-methylcyclobutoxy)phenyl)ethane (**13**), one diastereomer

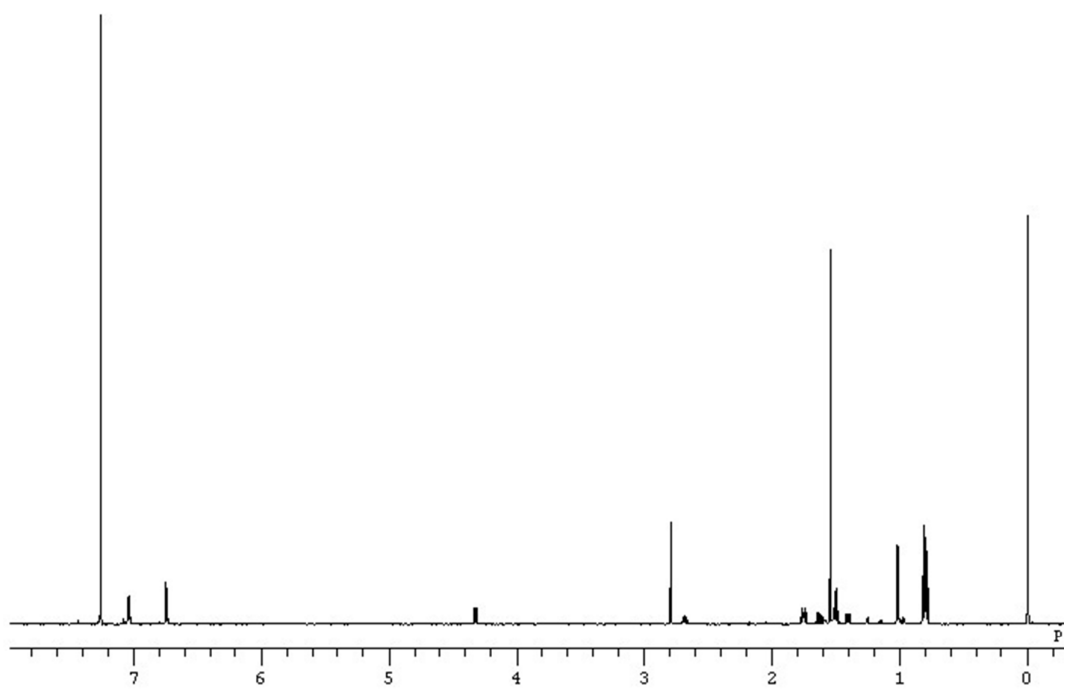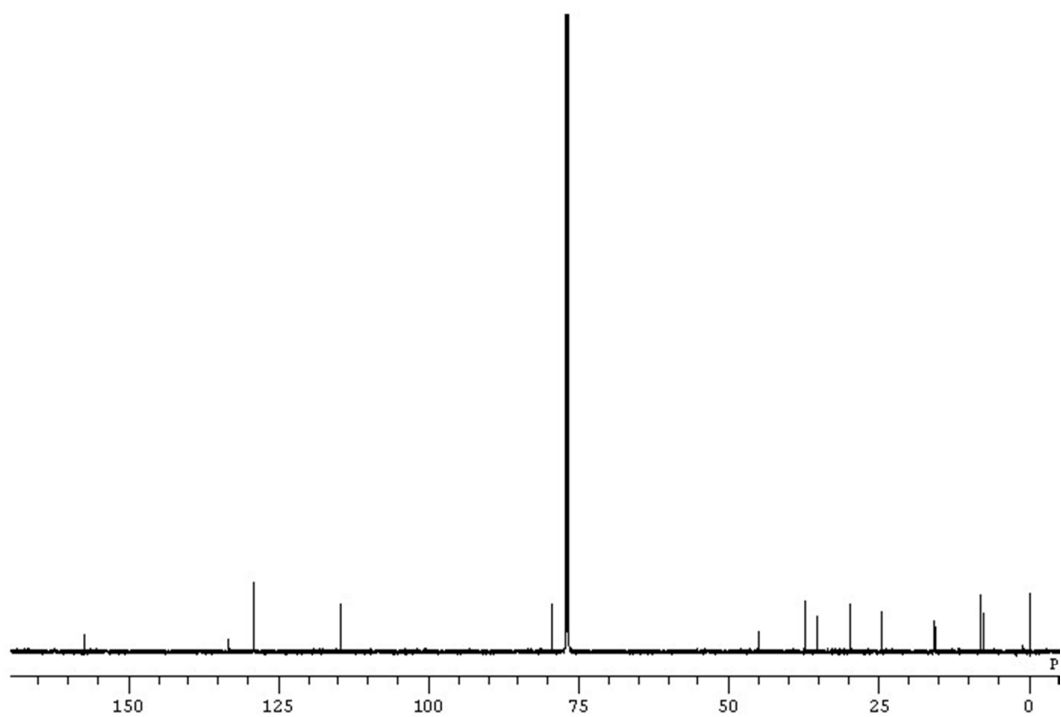

1,2-bis(4-(2,2-diethyl-4-methylcyclobutoxy)phenyl)ethane (**13**), mixture of other diastereomers

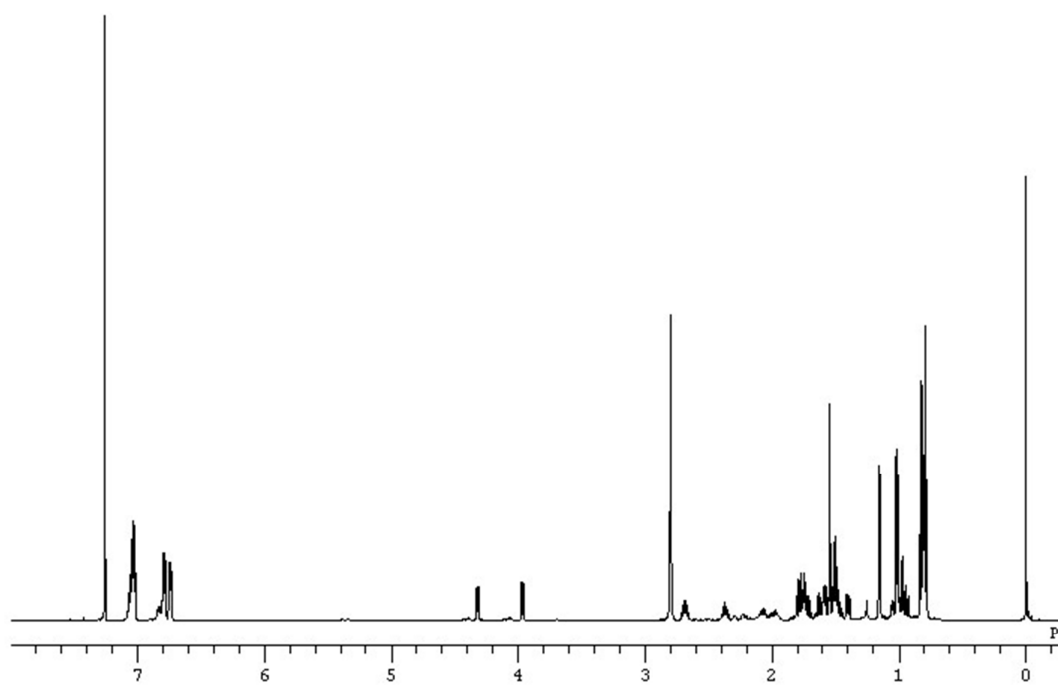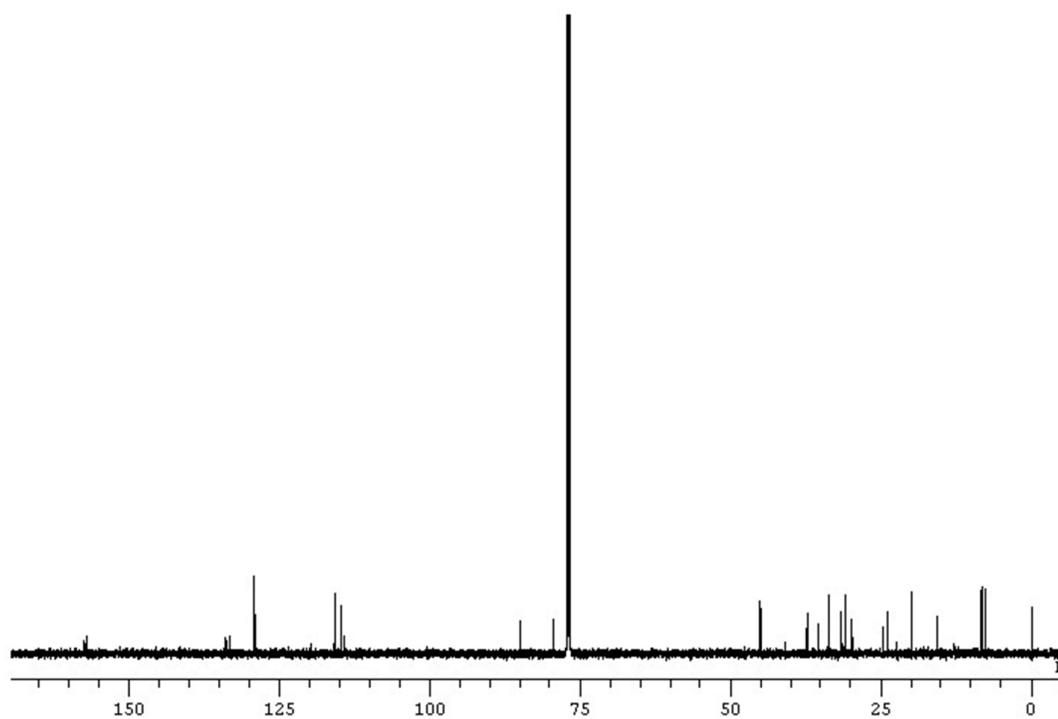

bis(4-(prop-1-en-1-yloxy)phenyl)methane (**9**), mixture of diastereomers

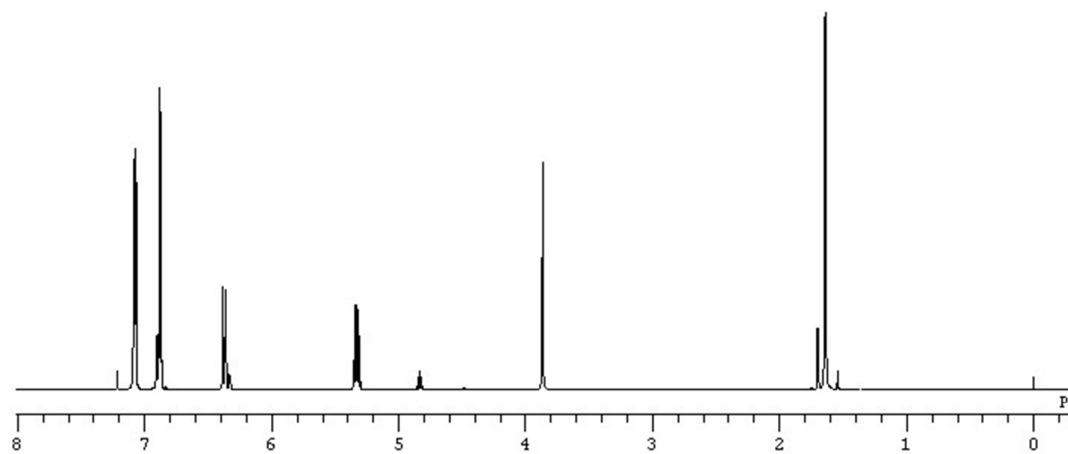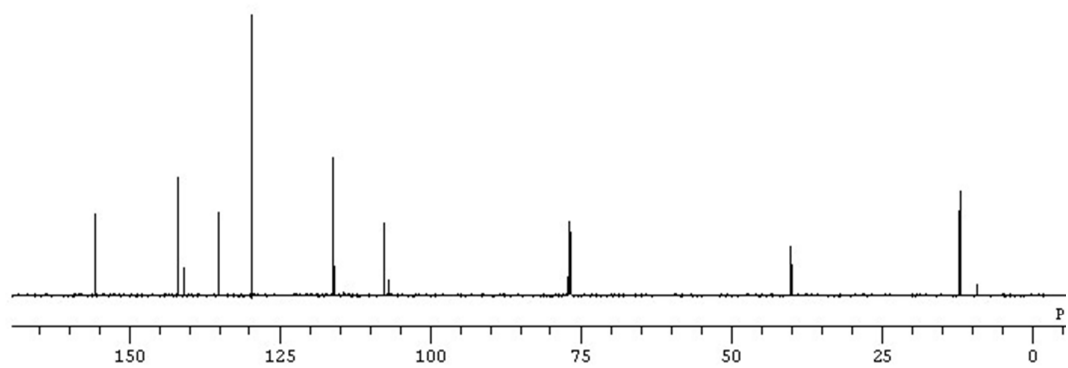

1-(2,2-diethyl-4-methylcyclobutoxy)-4-(4-(prop-1-en-1-yloxy)benzyl)benzene (**14**), mixture of diastereomers

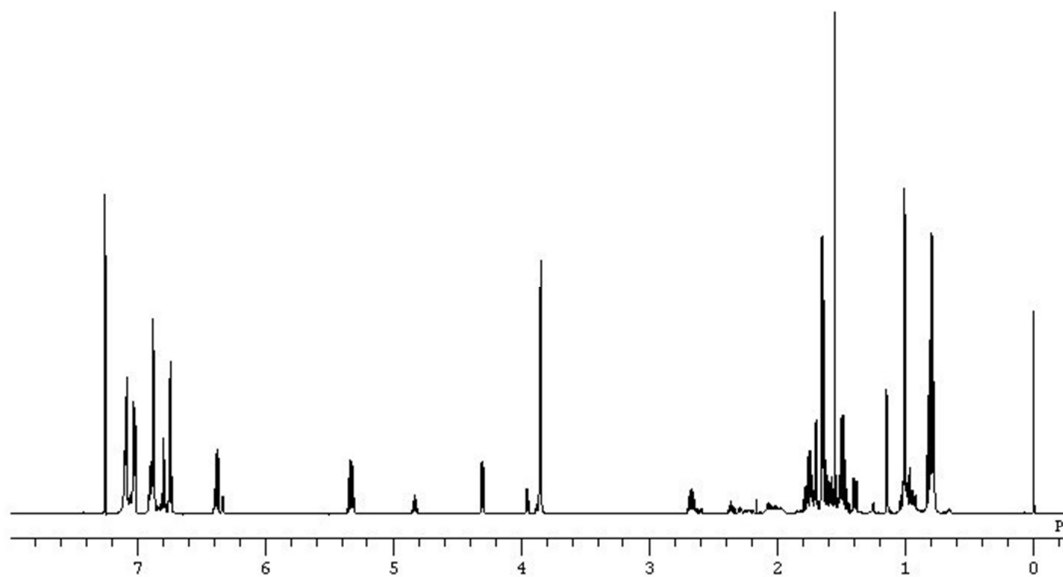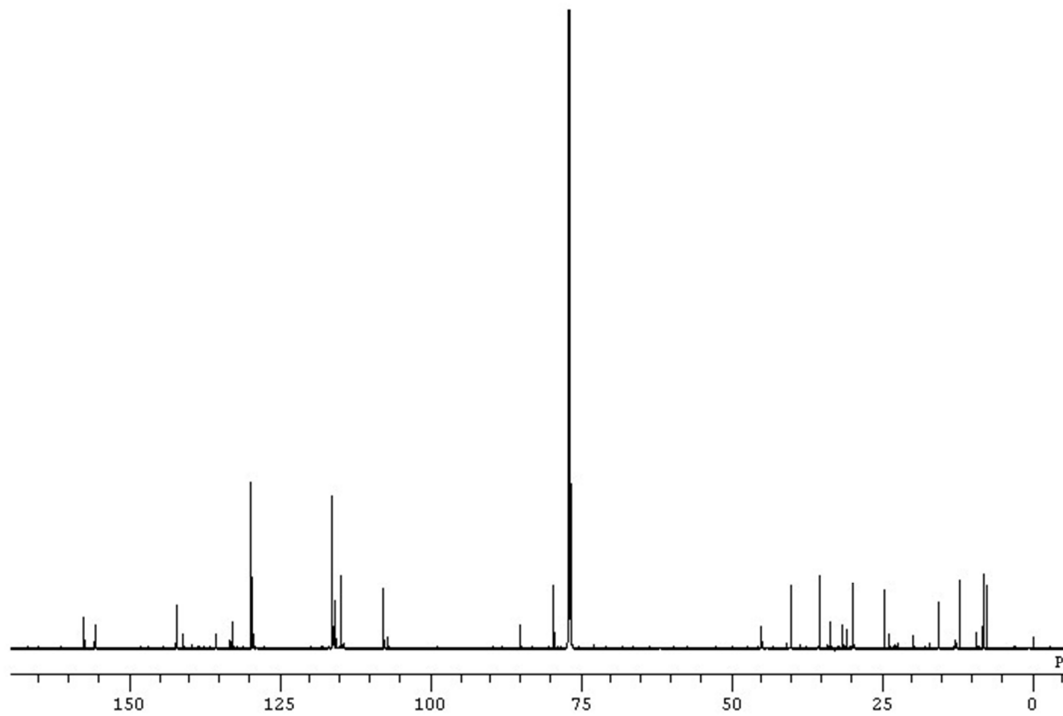

bis(4-(2,2-diethyl-4-methylcyclobutoxy)phenyl)methane (**15**), mixture of diastereomers

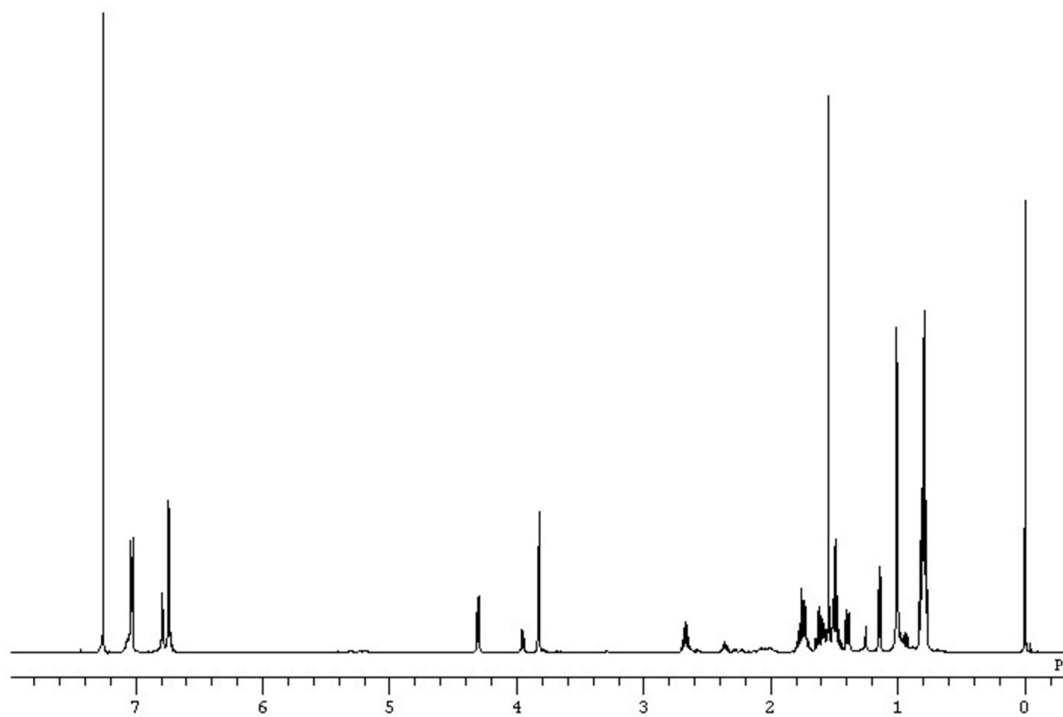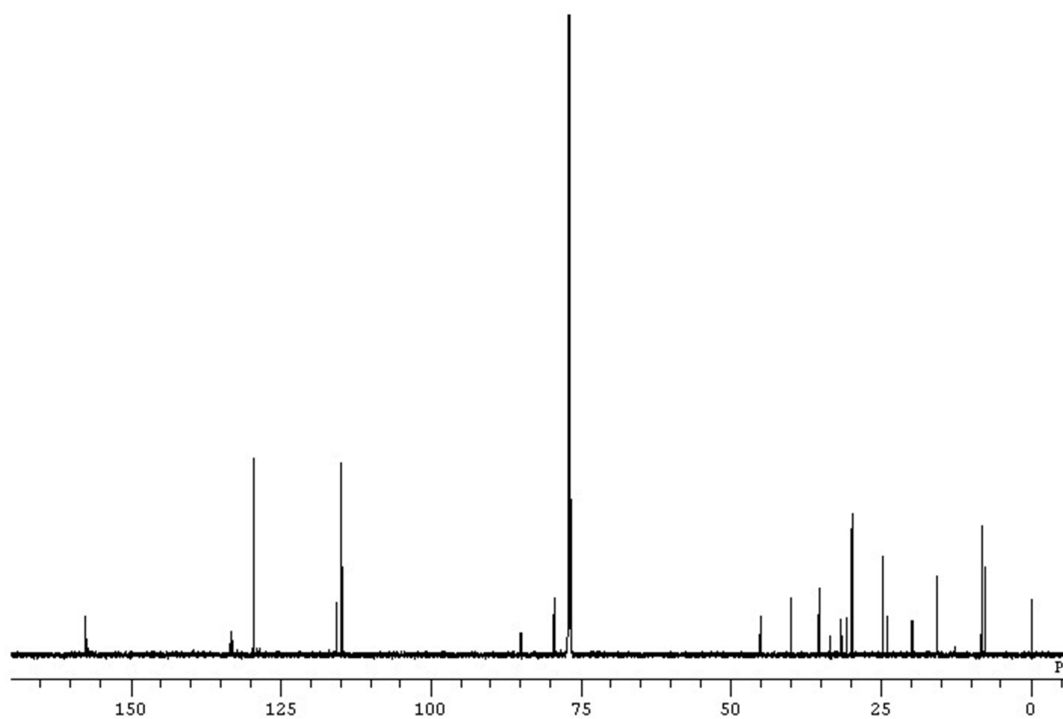

4,4'-(propane-2,2-diyl)bis((prop-1-en-1-yloxy)benzene) (**16**), mixture of diastereomers

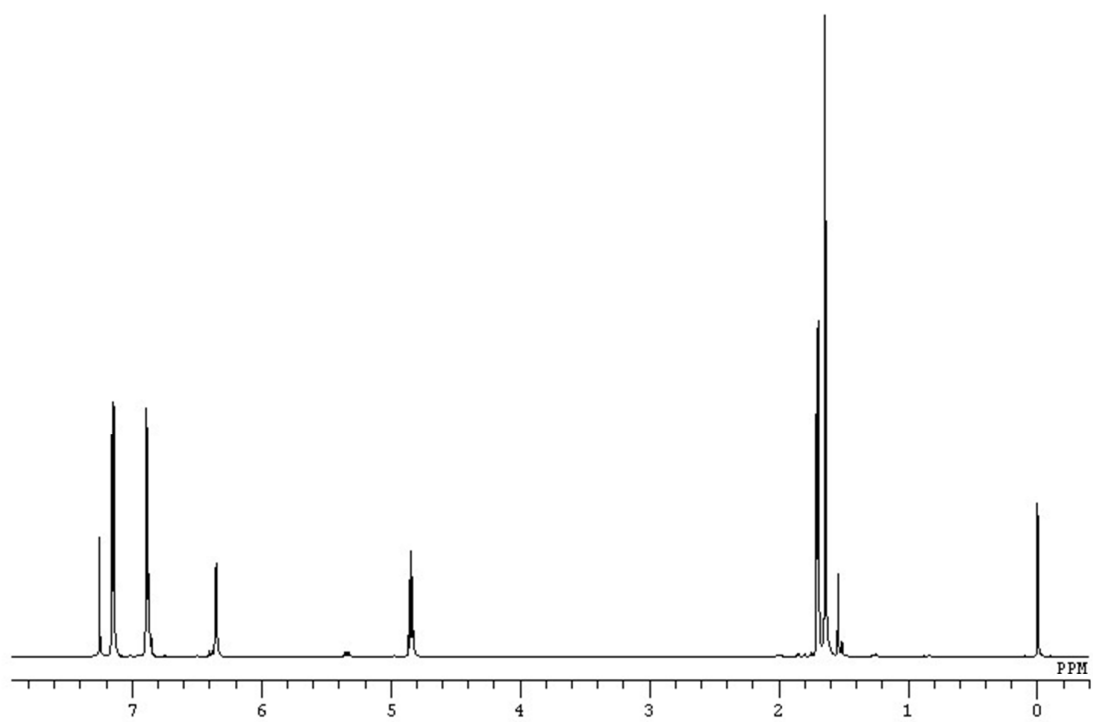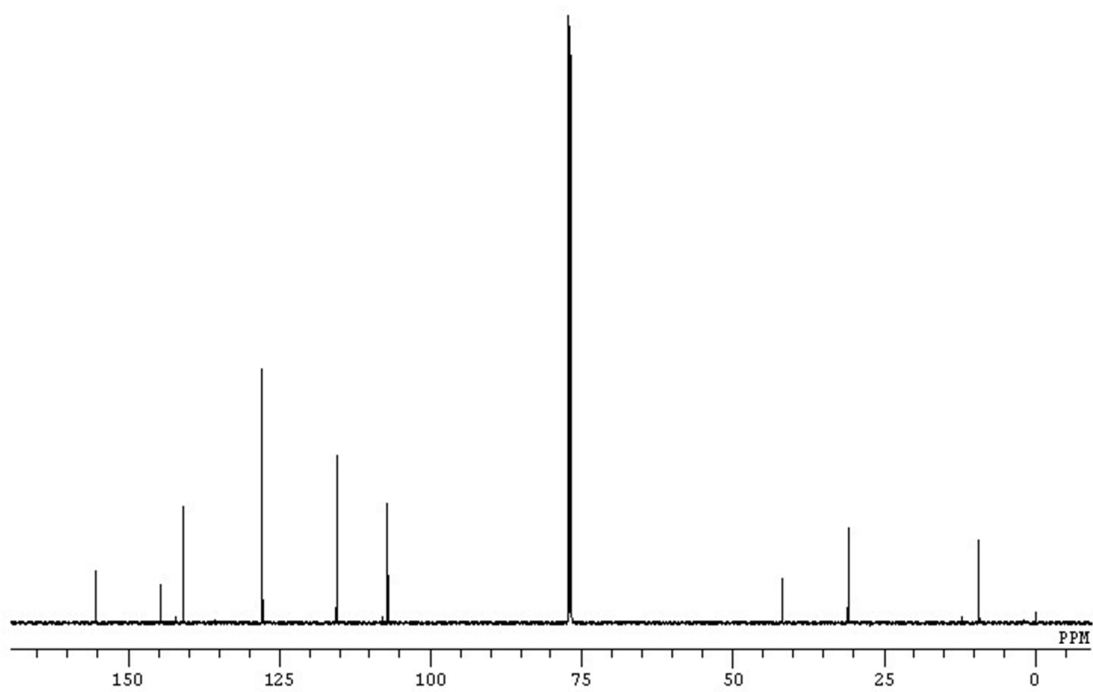

1-(2,2-diethyl-4-methylcyclobutoxy)-4-(2-(4-(prop-1-en-1-yloxy)phenyl)propan-2-yl)benzene (**17**),  
mixture of diastereomers

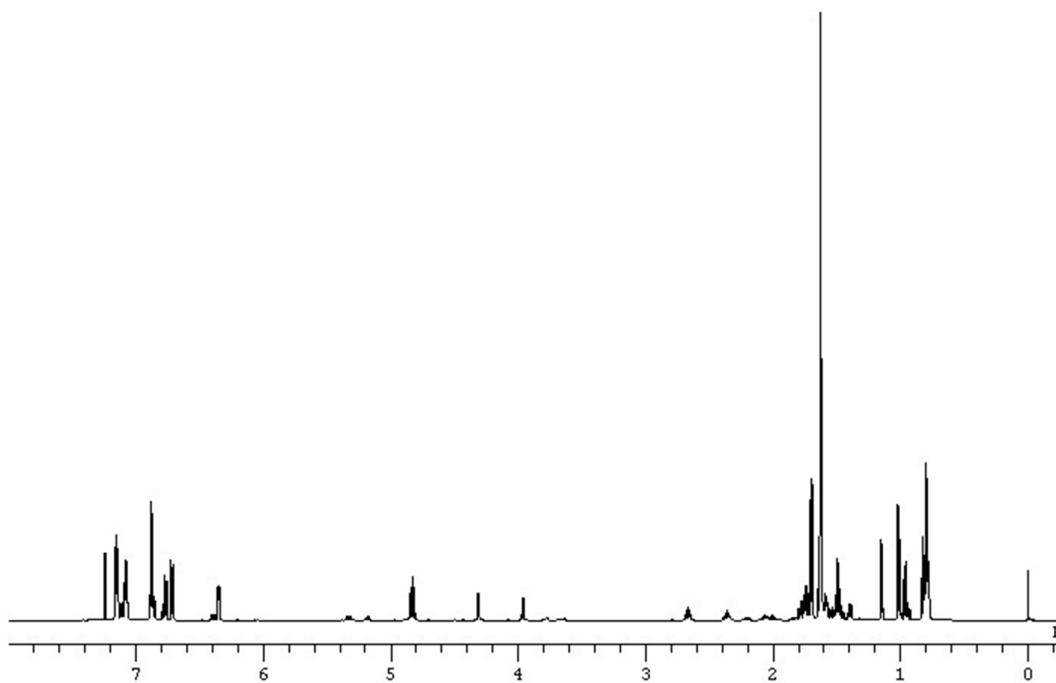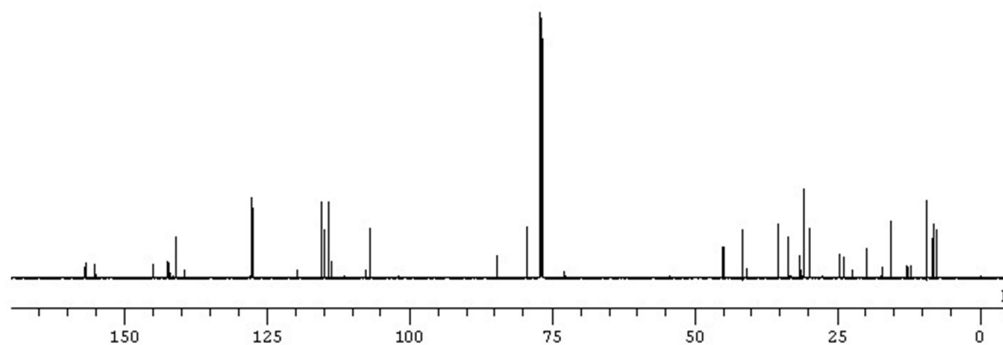



4,4'-(propane-2,2-diyl)bis((2,2-diethyl-4-methylcyclobutoxy)benzene) (**18**), one diastereomer

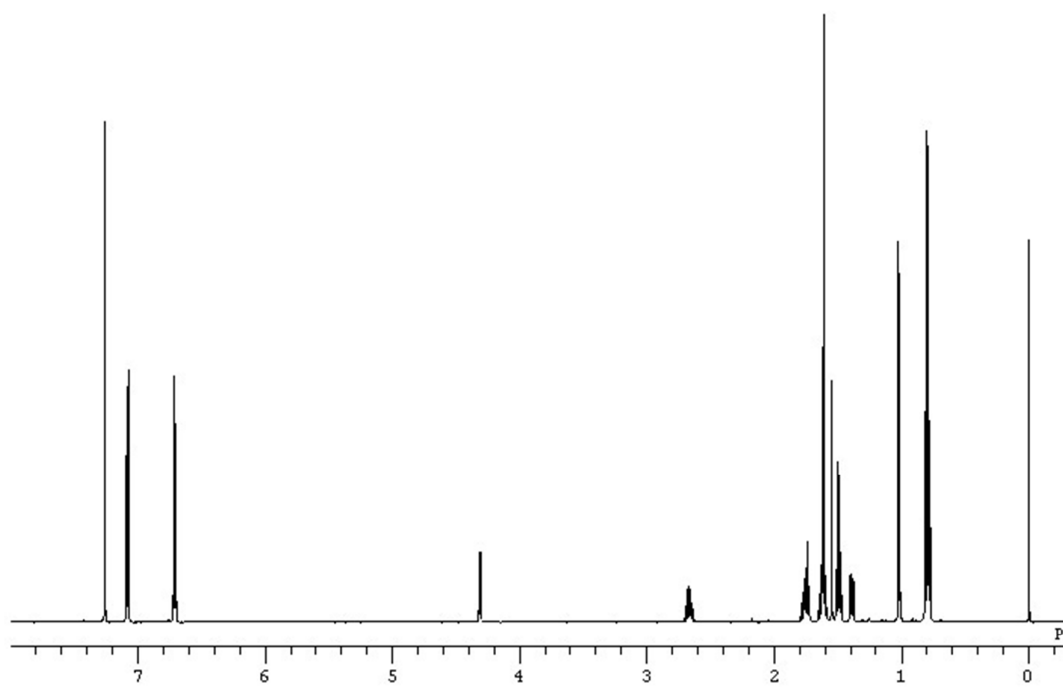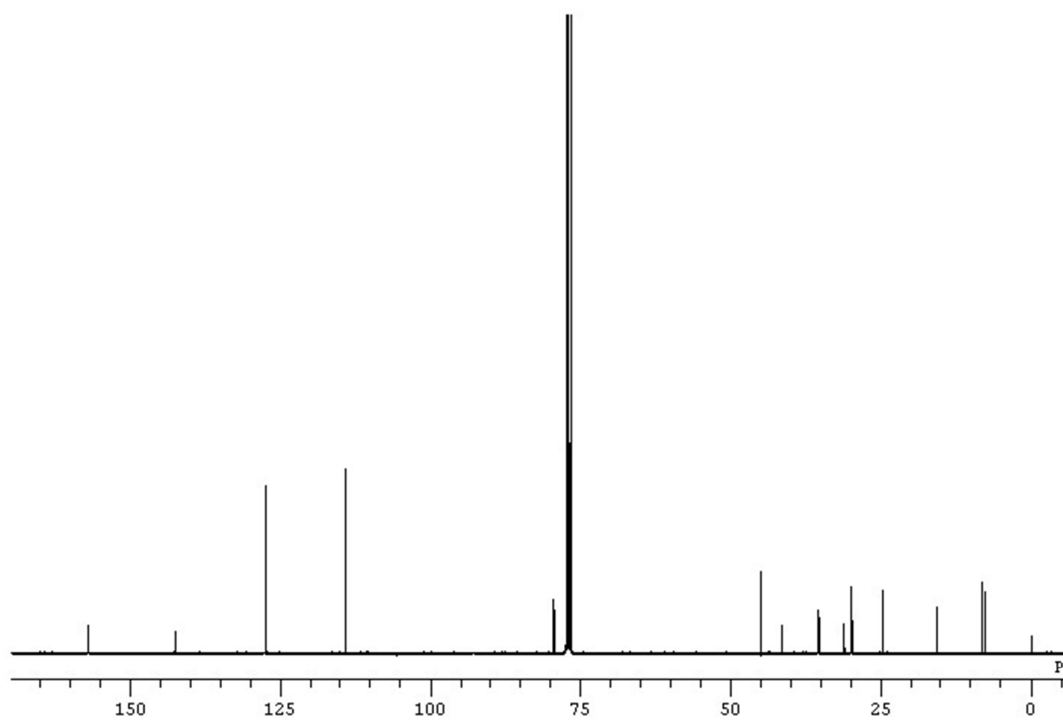

4,4'-(propane-2,2-diyl)bis((2,2-diethyl-4-methylcyclobutoxy)benzene) (**18**), mixture of other diastereomers

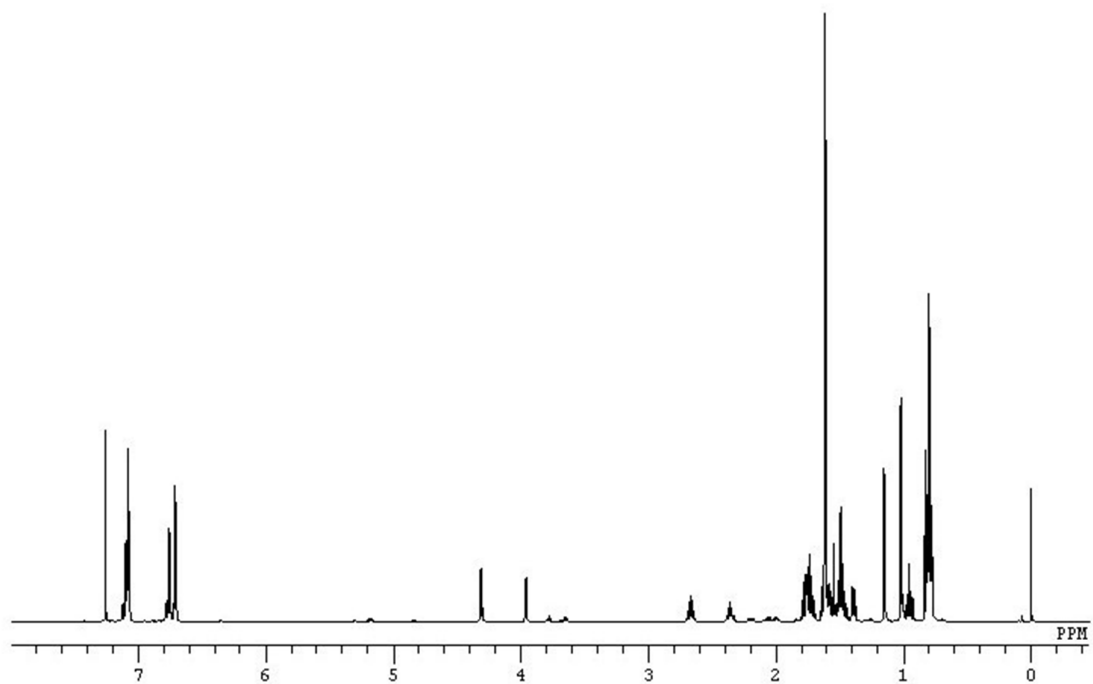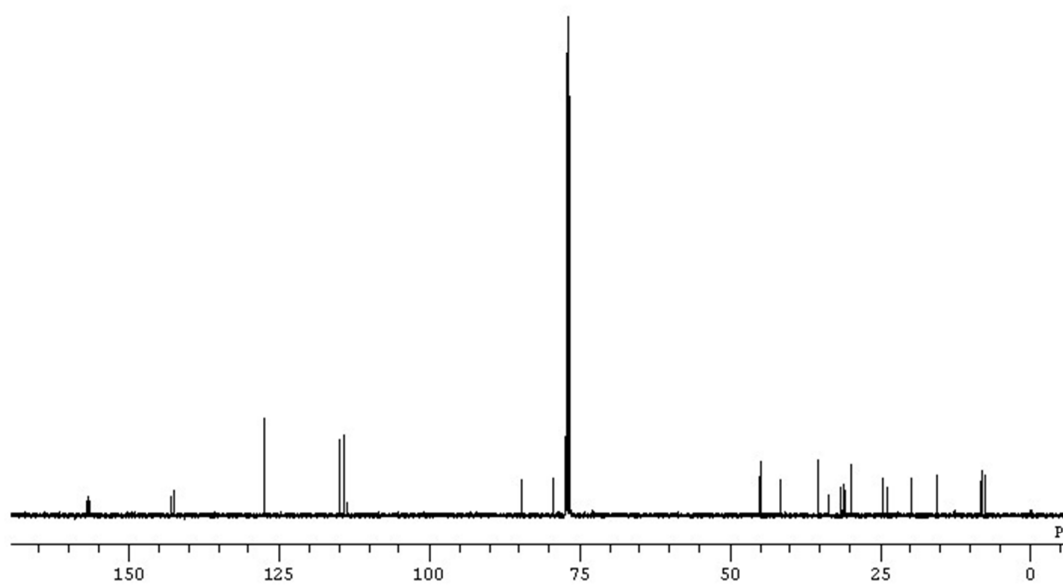

Supplement: Supplementary file 1 [file 4076449]
